# Supplementary material
Source: publisher figshare collection journal article supplement (https://karger.figshare.com/articles/dataset/_/4047318)

**Bergner S, Halec G, Schmitt M, Aubin F, Alonso A, Auvinen E:**

Individual and complementary effects of human papillomavirus oncogenes on epithelial cell proliferation and differentiation  
*Cells Tissues Organs*

**Fig. S4.** Measurement of tissue thickness in the different HPV 16 containing and control raft cultures. From two independent raft cultures for each HPV 16 construct or control, tissue thickness was measured from a minimum of three fields from three different sections each (18 data points at minimum). Statistical significance was calculated using the Bonferroni-Dunn test. \*,  $p < 0,05$  as compared to HaCaT control; #,  $p < 0,05$  as compared to pEGFP; §,  $p < 0,05$  as compared to HPV 16 E6-E7-, respectively. Extreme values are depicted by grey triangles. See also Table S1.

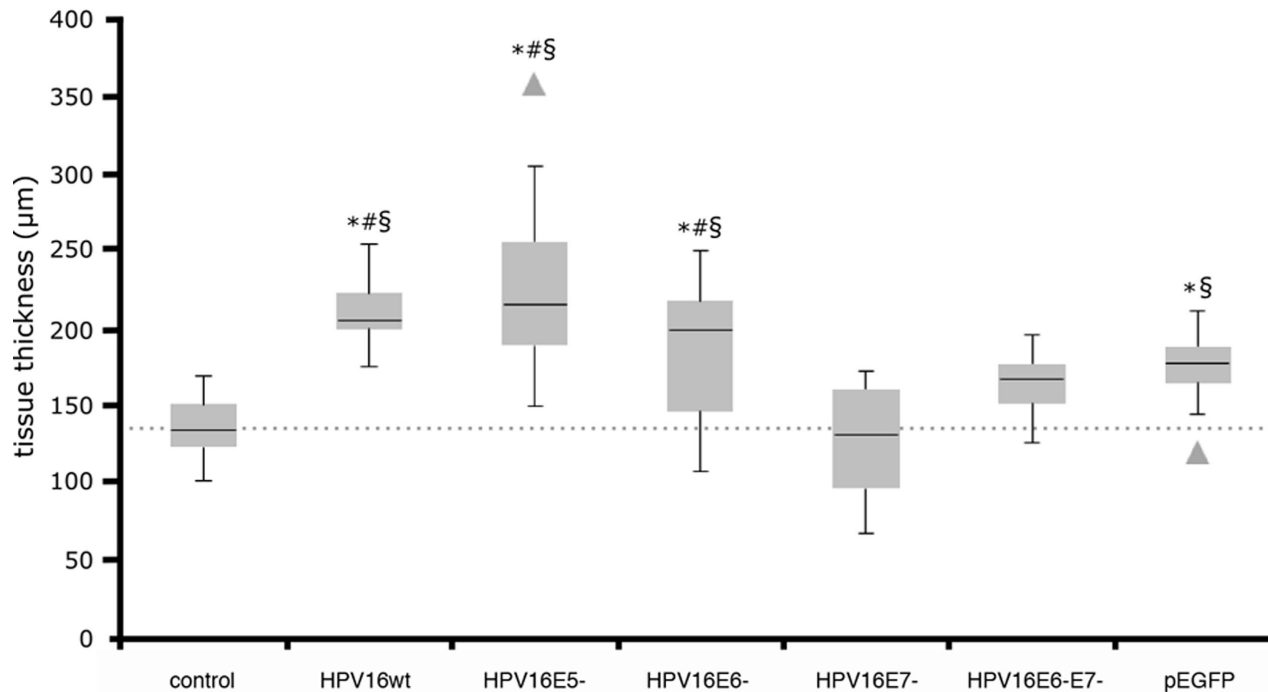

Supplement: Supplementary file 1 [file 1]
