# Supplementary material
Source: publisher figshare collection journal article supplement (https://karger.figshare.com/articles/dataset/_/4047318)

**Bergner S, Halec G, Schmitt M, Aubin F, Alonso A, Auvinen E:**

Individual and complementary effects of human papillomavirus oncogenes on epithelial cell proliferation and differentiation

*Cells Tissues Organs*

**Fig. S6.** Expression of involucrin and cytokeratin 14 in HPV 16 harboring raft cultures. Paraffin sections were stained with antibodies to involucrin expressed in terminally differentiated cells (green), and cytokeratin 14 (K14; red), which is expressed in undifferentiated cells. Nuclei were stained with DAPI (blue). Magnifications are given of selected areas in HPV16wt. The size bar represents 50  $\mu\text{m}$ .

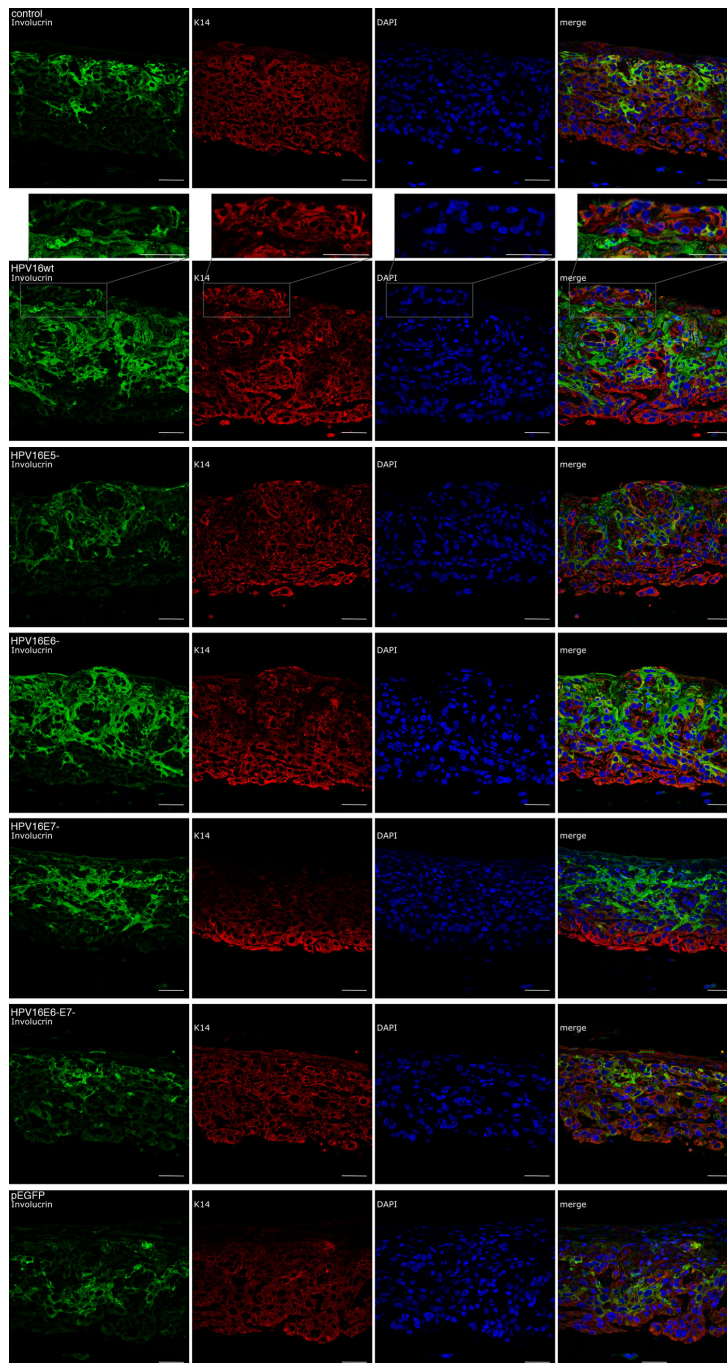

Supplement: Supplementary file 2 [file 1]
