# Supplementary material
Source: publisher figshare collection journal article supplement (https://karger.figshare.com/articles/dataset/_/4047318)

**Bergner S, Halec G, Schmitt M, Aubin F, Alonso A, Auvinen E:**

Individual and complementary effects of human papillomavirus oncogenes on epithelial cell proliferation and differentiation  
*Cells Tissues Organs*

**Fig. S3.** Detection of wild-type and mutant HPV 16 DNA and E1<sup>^</sup>E4 transcription by PCR. The presence of episomal HPV 16 DNA was shown by conventional PCR.  $\beta$ -globin was used as a technical control for PCR. The presence and correct splicing of E1<sup>^</sup>E4 transcripts was shown by RT-PCR.  $\beta$ -actin was amplified in parallel for control.

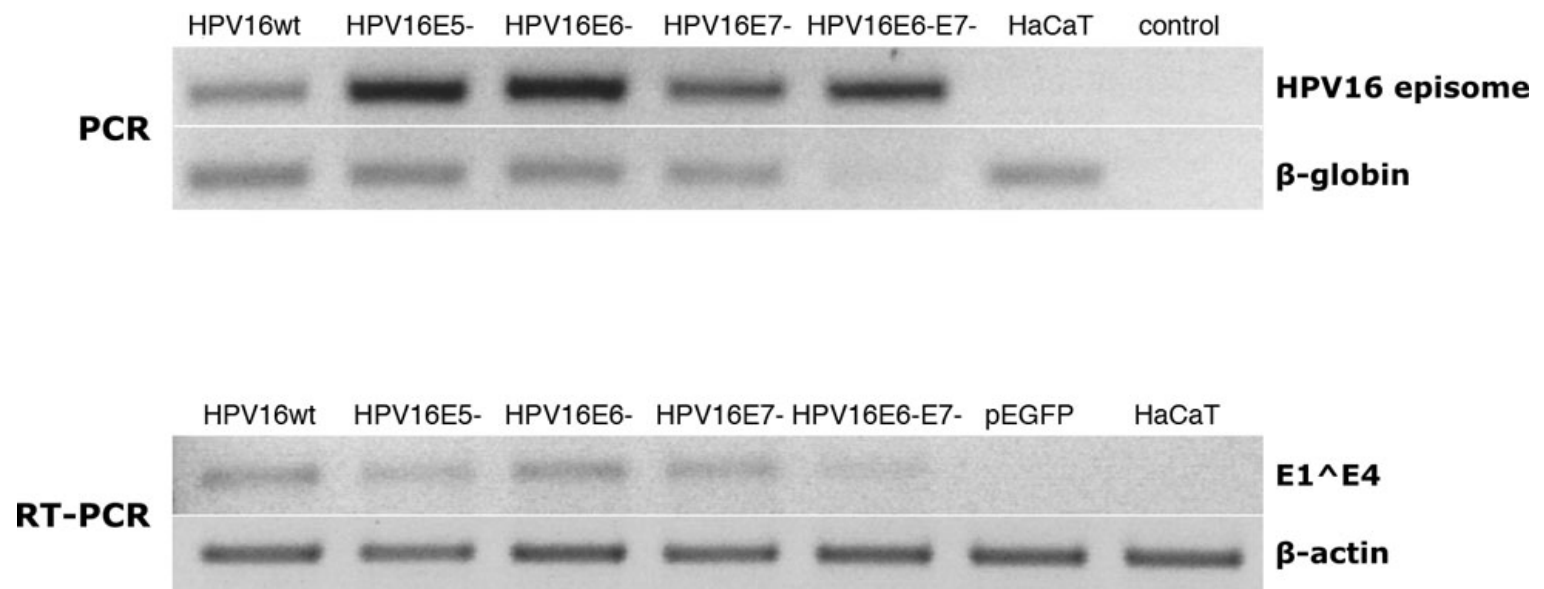

Supplement: Supplementary file 3 [file 1]
