# Supplementary material
Source: publisher figshare collection journal article supplement (https://karger.figshare.com/articles/dataset/_/4047318)
Supplement: Supplementary file 4 [file 1]

Archive with 7 entries (7 files):
- CTO441716_Figure_1.pdf
- CTO441716_Figure_2.pdf
- CTO441716_Figure_3.pdf
- CTO441716_Figure_4.pdf
- CTO441716_Figure_5.pdf
- CTO441716_Figure_6.pdf
- CTO441716_Table.docx
