# Supplementary material
Source: publisher figshare collection journal article supplement (https://karger.figshare.com/articles/dataset/_/4047318)

**Bergner S, Halec G, Schmitt M, Aubin F, Alonso A, Auvinen E:**

Individual and complementary effects of human papillomavirus oncogenes on epithelial cell proliferation and differentiation  
*Cells Tissues Organs*

**Fig. S1.** Map of the loxp\_HPVI6\_peGFP-N1 plasmid.

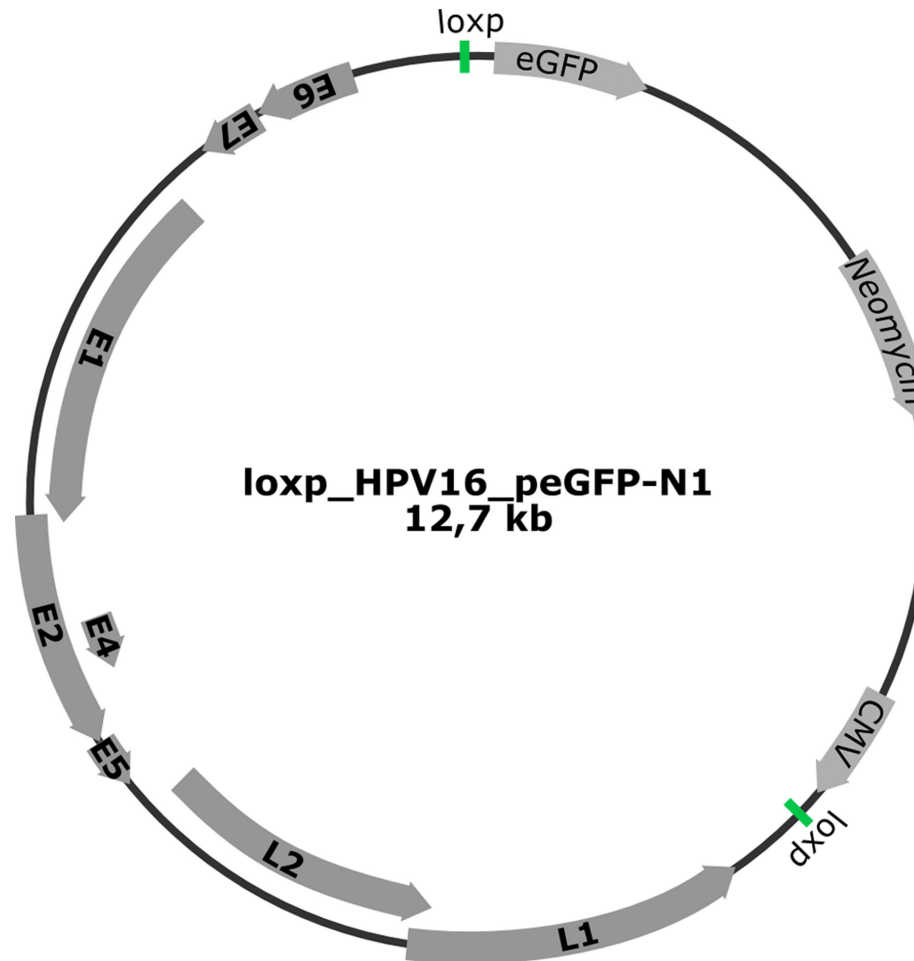

Supplement: Supplementary file 4 [file 1 › CTO441716_Figure_1.pdf]
