# Supplementary material
Source: publisher figshare collection journal article supplement (https://karger.figshare.com/articles/dataset/_/4047318)

**Bergner S, Halec G, Schmitt M, Aubin F, Alonso A, Auvinen E:**

Individual and complementary effects of human papillomavirus oncogenes on epithelial cell proliferation and differentiation  
*Cells Tissues Organs*

**Fig. S2.** GFP fluorescence in HaCaT cells 32 hours after transfection with wild-type HPV 16, or control HaCaT cells. **A.** Wild-type HPV 16 transfected cells cotransfected with Cre recombinase (+ Cre) or cells without Cre recombinase (- Cre) under fluorescence microscope and transmitted light (TL). **B.** Detection of GFP expression after recombination in cells cotransfected with Cre recombinase (+ Cre) but not in cells without Cre (- Cre) using immunoblotting. Actin was used as a loading control.

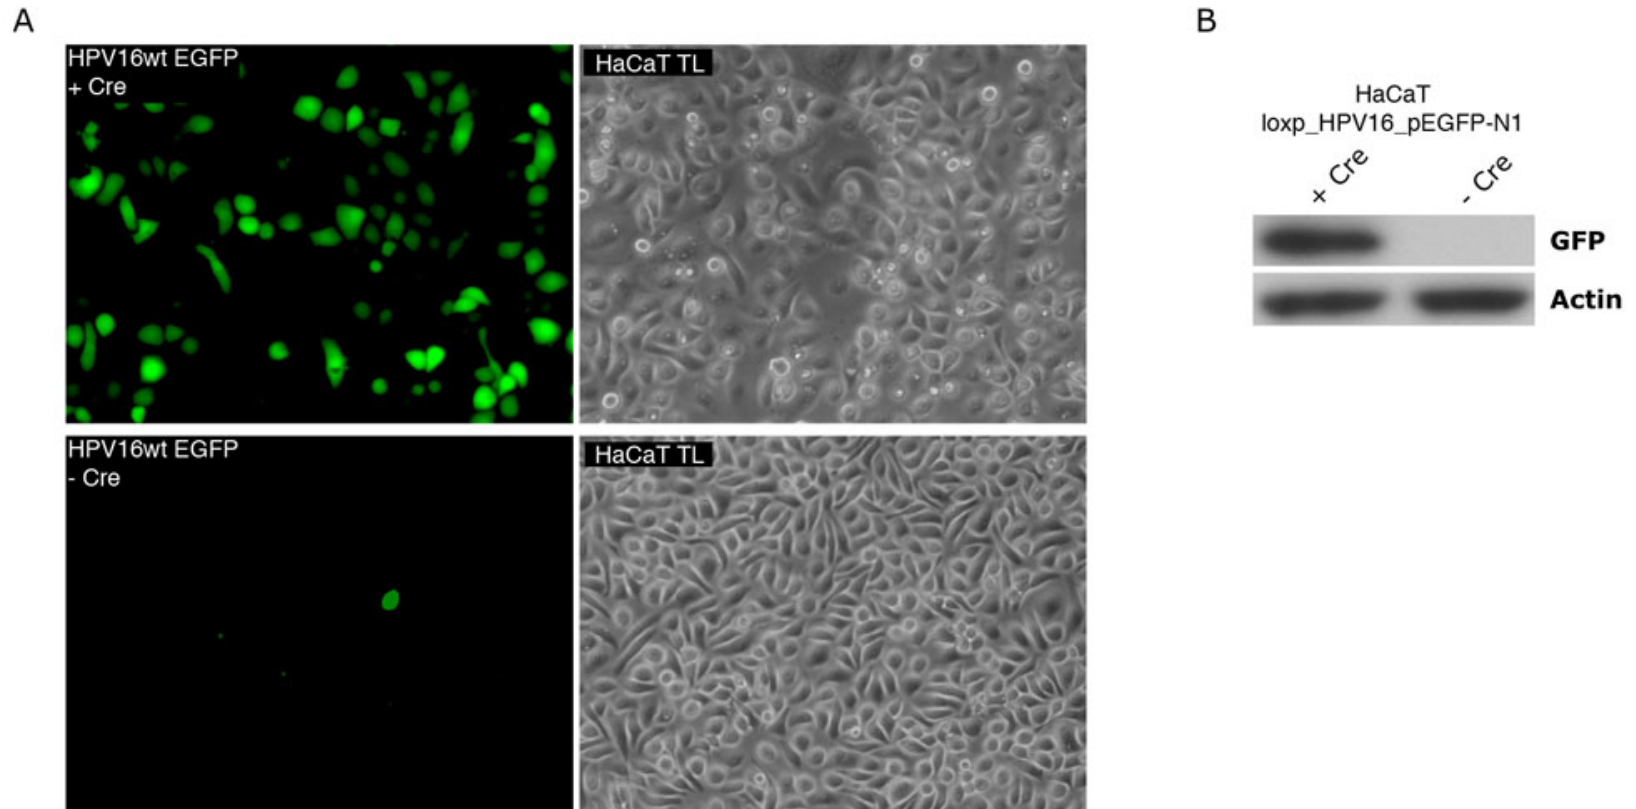

Supplement: Supplementary file 4 [file 1 › CTO441716_Figure_2.pdf]
