# Supplementary material
Source: publisher figshare collection journal article supplement (https://karger.figshare.com/articles/dataset/_/4047318)

**Bergner S, Halec G, Schmitt M, Aubin F, Alonso A, Auvinen E:**

Individual and complementary effects of human papillomavirus oncogenes on epithelial cell proliferation and differentiation

*Cells Tissues Organs*

**Fig. S5.** Detection of proliferating (BrdU positive) cells in HPV-containing collagen raft cultures. BrdU was added to raft cultures 12 before collecting the rafts, and then stained with antibodies to BrdU (green). Staining for lamin in nuclear membranes (red) was used as counterstain. The dotted line in HPV16E5- BrdU shows a site where BrdU positive cells reach from basal cells all the way to the uppermost cell layers. The size bar represents 50  $\mu$ m.

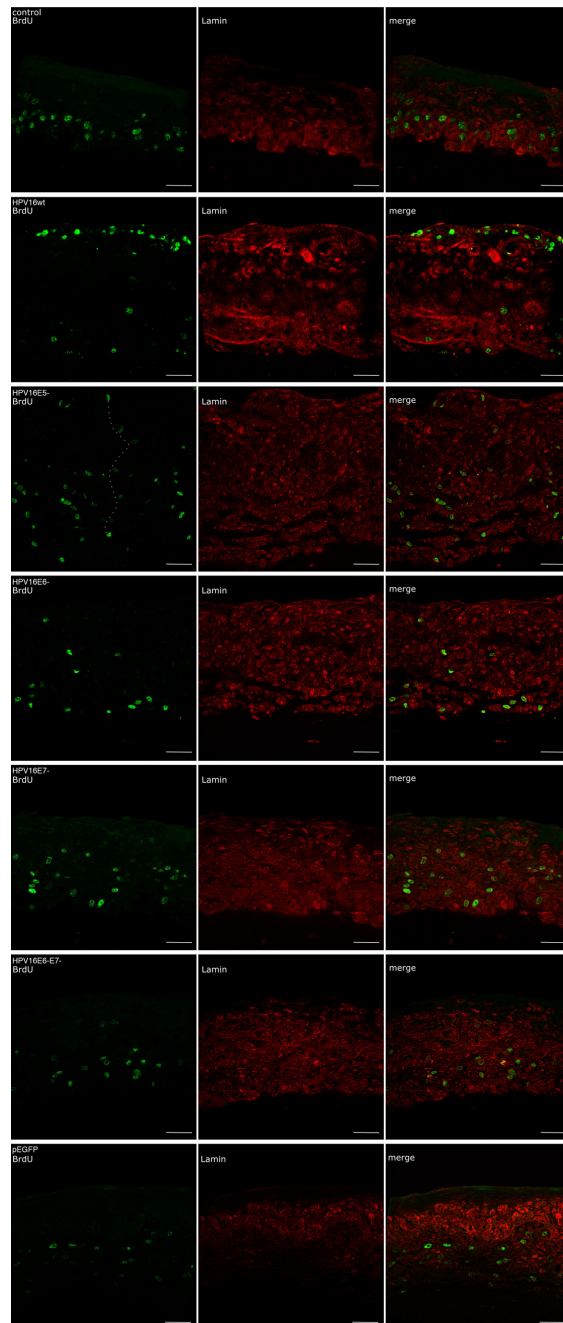

Supplement: Supplementary file 4 [file 1 › CTO441716_Figure_5.pdf]
