# Supplementary material
Source: publisher figshare collection journal article supplement (https://karger.figshare.com/articles/dataset/_/4047318)
Supplement: Supplementary file 4 [file 1 › CTO441716_Table.docx]

**Bergner S, Halec G, Schmitt M, Aubin F, Alonso A, Auvinen E:**

Individual and complementary effects of human papillomavirus oncogenes on epithelial cell proliferation and differentiation

*Cells Tissues Organs*

**Table S1.** Measurement of tissue thickness in the different HPV 16 containing and control raft cultures. From two independent raft cultures for each HPV 16 construct or control, tissue thickness was measured from a minimum of three fields from three different sections each. Median thicknesses are given. N, number of measurements (18 data points at minimum). See also Figure S4.

|  | Median | N |
| --- | --- | --- |
| Control | 137,8 μm | 26 |
| HPV16wt | 206,6 μm | 18 |
| HPV16E5- | 217,0 μm | 24 |
| HPV16E6- | 201,4 μm | 27 |
| HPV16E7- | 134,0 μm | 18 |
| HPV16E6-E7- | 169,4 μm | 18 |
| pEGFP | 179,9 μm | 27 |
